# Supplementary material
Source: PubMed Central journal article supplement (PMC4024908)
Supplement: 1322838111_pnas.201322838SI.pdf [file 1322838111_pnas.201322838SI.pdf]

# Supporting Information

Huh et al. 10.1073/pnas.1322838111

## SI Materials and Methods

**Mice.** WT C57BL/6 and BALB/c mice were purchased from Jackson Laboratories and Japan SLC, respectively. BALB/c Toll-like receptor 5 (TLR5)<sup>-/-</sup> mice, backcrossed to the BALB/c strain for seven generations, were previously reported (1). C57BL/6 3d mice, which were provided by Koichi Tabeta (Niigata University, Niigata, Japan), were introgressively backcrossed to the BALB/c strain for 12 generations, and used as BALB/c 3d mice. UNC93B1-deficient mice in the C57BL/6 background were obtained from the Knockout Mouse Project Repository (University of California, Davis, CA). All animals were housed in specific pathogen-free facilities at Pohang University of Science and Technology or at the Institute of Medical Science at the University of Tokyo. All animal experiments were approved by the animal research committee of either Pohang University of Science and Technology or University of Tokyo.

**Reagents.** MALP-2, Pam<sub>3</sub>CSK<sub>4</sub>, R848, and loxoribine were purchased from Enzo Life Sciences. Ultrapure flagellin purified from *Salmonella typhimurium* was purchased from Life Sciences or InvivoGen. Lipid A purified from *Salmonella minnesota* (Re-595), LPS from *Escherichia coli* (026:B6), Brefeldin A, and anti-flag (M2) antibody were from Sigma-Aldrich. CpG ODN1826 and ODN1668 were synthesized by TIB Molbiol and FASMAC, respectively. Mouse anti-GFP (B-2) and rat monoclonal anti-HA (3F10) antibodies were purchased from Santa Cruz and Roche, respectively. Mouse monoclonal anti-myc (9B11), rabbit anti-IκB, and mouse anti-phospho-IκB (5A5) antibodies were from Cell Signaling. Rabbit anti-actin antibody was from Bethyl Laboratories. Rabbit anti-GFP and anti-myc antibodies were made in our laboratory by injecting rabbits with purified GFP protein and peptides containing the EQKLISEEDL sequence, respectively. Protein A-agarose bead was purchased from Repligen. APC-conjugated anti-mouse TNF (clone MP6-XT22) was from BD Biosciences.

**Cell Lines.** Murine RAW 264.7 macrophages and HEK 293T cells were cultured in DMEM media supplemented with 5% FBS. RAW stable cell lines expressing epitope-tagged TLR or UNC93B1 proteins were generated by retroviral transduction and selected with 100 μg/mL G418 for UNC93B1-transduced cells and 5 μg/mL puromycin for TLR-transduced cells. Retrovirus preparation and transduction were performed as previously described (2). Ba/F3 cells were cultured in RPMI 1640 media supplemented with 10% FBS, penicillin–streptomycin–glutamine, 50 μM 2-mercaptoethanol, and IL-3 produced by CHO cells overexpressing murine IL-3. J774 cells were cultured in DMEM supplemented with 10% FBS, penicillin–streptomycin–glutamine, and 50 μM 2-mercaptoethanol. Ba/F3 stable cell line with mouse TLR5-flag and NF-κB-GFP reporter were previously described (1). To suppress the endogenous UNC93B1 expression in Ba/F3 and J774 cells, each cell line was transduced with retrovirus generated by transient transfection of Plat-E packaging cells with the retroviral vector pS5CH encoding UNC93B1-specific shRNA (5'-ggaactctccaaggagata-3') and selected with hygromycin B. Cells transduced with retrovirus made of the empty vector were used as a control.

**DNA Constructs.** pMSCVpuro-TLR9-myc, pMSCVpuro-TLR4-myc, pMSCVneo-UNC93B1-HA, pMSCVneo-UNC93B1-cherry, and pMSCVneo-cherry-KDEL (ER-cherry) were previously described (3). pMSCVpuro-TLR5-GFP and pMSCVpuro-TLR5-

myc were cloned by PCR by using pcDNA3-TLR5-CFP (Addgene) as a template. The linker nucleotide sequence between TLR5 and EGFP is 5'-atgtcagcgtaccgcccggccgggagccaccggtgccacc-3' (encoding the amino acid sequence MSTVPRARDPPVAT). The myc epitope tag (EQKLISEEDL) was directly fused to the carboxyl end of TLR5 without an intervening linker sequence. pMSCVpuro-TLR5-GFP mutant (DE/ST), in which the DEEE sequence (amino acid residues 630~633) of TLR5 was substituted with STTT, were generated by PCR by using the following primers: 5'-tgtagtctactacaaccttcctggaaagag-3' and 5'-tgtagtacgactacagtctaaagtcctaaagttc-3'. Underlined bases represent the sense or antisense nucleotide sequence for STTT.

**Preparation of Splenic Dendritic Cells.** Spleens were extracted from indicated mice, minced with scissors into small pieces, and incubated with RPMI media supplemented with 3% FBS, 20 mM Hepes, 1 mM sodium pyruvate, 1 mM nonessential amino acid, penicillin/streptomycin, 100 μg/mL DNase I (Roche), and 1 mg/mL collagenase D (Roche) for 45 min at 37 °C with vigorous shaking. The enzyme digestion was stopped by adding EDTA to the final concentration of 10 mM. The spleen homogenate was filtered with a cell strainer (100 μm); washed once with PBS buffer containing 3% FBS, 10 mM EDTA, 20 mM Hepes, 1 mM sodium pyruvate, penicillin/streptomycin; loaded onto 17.5% (wt/vol) Accudenz solution (Gentaur Molecular Products); and centrifuged at 800 × g for 20 min. After centrifugation, a cloudy cell layer in the middle of the gradient solution was collected as the splenic dendritic cell (DC) fraction, purity of which was analyzed by flow cytometry with staining of CD11c and MHC class II.

**Preparation of Lamina Propria Dendritic Cells.** The preparation of small intestinal lamina propria DCs (LP-DCs) has been described (4). In brief, small intestines were extracted, and the fatty tissues and Peyer patches were removed. The intestines were opened longitudinally, washed extensively in PBS solution, and cut into 1–2-cm lengths. The intestinal fragments were incubated in PBS solution containing 3% FBS, 20 mM Hepes, 100 U/mL penicillin, 100 μg/mL streptomycin, 1 mM sodium pyruvate, and 10 mM EDTA for 20 min at 37 °C with vigorous stirring. After washing with PBS solution, the fragments were further incubated at 37 °C for 45 min in RPMI 1640 media containing 3% FBS, 20 mM Hepes, 100 U/mL penicillin, 100 μg/mL streptomycin, 1 mM sodium pyruvate, 1 mM nonessential amino acid, 400 U/mL collagenase D, and 100 μg/mL DNase I with vigorous stirring. The cell suspension was filtered through nylon mesh and spun over a Percoll gradient [75/40% (wt/vol)]. The cells in the inter phase were collected and sorted on the basis of their expression of CD11c and CD11b using MoFlo XDP (Beckman Coulter). For cytokine production, lamina propria DCs (1 × 10<sup>5</sup> per well) were cultured in RPMI 1640 media supplemented with 10% FBS, 10 mM Hepes, 100 U/mL penicillin, 100 μg/mL streptomycin, 50 μg/mL gentamicin, 1 mM sodium pyruvate, 55 μM 2-mercaptoethanol, 1 mM nonessential amino acid, 2 mM L-glutamine, and 10 ng/mL GM-CSF, and stimulated with 1 μg/mL of flagellin for 24 h.

**Cell Staining and Flow Cytometry Analysis.** Splenocyte single cell suspension was prepared as previously described (1). The splenocyte suspension and blood were cleared of red blood cells by lysis with 1× BD Pharm Lyse buffer (BD Biosciences) and filtering through nylon mesh. Blood leukocytes and splenocytes were stained as previously described (1) with the following

fluorophore-conjugated antibodies purchased from eBiosciences: CD4 (clone GK1.5), CD8 $\alpha$  (clone 53-6.7), CD11b (clone M1/70), CD11c (clone HL3), CD317 (PDCA-1, BST2; clone 927), Ly6C (clone HK1.4), and Ly6G (clone 1A8). Biotinylated anti-TLR5 (clone ACT5), anti-TLR2 (clone CB225), anti-TLR4/MD-2 (MTS510), and anti-CD14 (clone Sa2-8) monoclonal antibodies were previously established in our laboratory (1, 5). Cells labeled with biotinylated antibodies were further stained with fluorophore-conjugated streptavidin and analyzed by FACSaria or LSR Fortessa flow cytometers (BD Biosciences).

**ELISA.** Levels of IL-6, IL-12p40, G-CSF, and TNF- $\alpha$  in the cell supernatants or serum were measured with ELISA kits (R&D Systems) according to the manufacturer's protocol.

**Quantitative Real-Time PCR.** One microgram of total RNA purified by Nucleospin RNA XS kit (Macherey-Nagel) was reverse-transcribed into cDNA by using a ReverTra Ace qPCR RT Kit (TOYOBO). Quantitative PCR analyses were performed with a 7300 Fast Real Time PCR System (Applied Biosystems) using the TaqMan Gene Expression Assay set for mouse unc93b1 (Mm00457643). Each sample was normalized with mouse  $\beta$ -actin (Mm00607939).

**Immunoprecipitation and Deglycosylation.** Ba/F3:TLR5-flag cells were lysed in the lysis buffer containing 50 mM Tris-HCl (pH 7.5), 150 mM NaCl, 5 mM EDTA, 1% Triton X-100, 1 mM PMSF, 10  $\mu$ g/mL aprotinin, and 10  $\mu$ g/mL leupeptin for 30 min on ice. The cell lysates were incubated with anti-flag (M2)-agarose beads for 4 h at 4  $^{\circ}$ C. After washing with the lysis buffer three times, the beads were treated with endoglycosidase H or PNGase F according to the manufacturer's instruction (New England Biolabs). The immunoprecipitated proteins were eluted from the beads by boiling in the SDS sample buffer and subjected to SDS/PAGE. TLR5-flag was detected by immunoblotting with anti-flag (M2) antibody.

1. Shibata T, et al. (2012) PRAT4A-dependent expression of cell surface TLR5 on neutrophils, classical monocytes and dendritic cells. *Int Immunol* 24(10):613–623.
2. Kim J, et al. (2013) Acidic amino acid residues in the juxtamembrane region of the nucleotide-sensing TLRs are important for UNC93B1 binding and signaling. *J Immunol* 190(10):5287–5295.
3. Kim YM, Brinkmann MM, Paquet ME, Ploegh HL (2008) UNC93B1 delivers nucleotide-sensing toll-like receptors to endolysosomes. *Nature* 452(7184):234–238.

**Confocal Imaging and Analysis.** Live bone marrow-derived DCs (BMDCs) or HEK 293T cells expressing various fluorescent fusion proteins were imaged with a spinning-disk confocal microscope as previously described (2). For costaining of the plasma membrane, BMDCs were incubated with 1  $\mu$ g/mL of Alexa Fluor 555-conjugated cholera toxin B (Invitrogen) for 20 min on ice, fixed with 2% paraformaldehyde for 10 min, and imaged. To quantify the degrees of colocalization of two proteins, pixel intensities of two different fluorophores were measured by using a linescan tool in MetaMorph software and the Pearson correlation coefficient ( $\rho$ ) was determined by using Microsoft Excel.

**Bimolecular Fluorescence Complementation Assay.** Vectors encoding the aminoterminal ( $V_N$ ; aa 1–177) or the carboxyterminal ( $V_C$ ; aa 155–238) fragment of Venus fluorescent protein were provided by Michael Frohman (Stony Brook University, Stony Brook, NY) (6). By standard molecular cloning protocols, the  $V_N$  or  $V_C$  fragment of Venus was fused to the carboxyl terminal end of TLR4, TLR5, and TLR9. UNC93B1 was fused with the  $V_C$  fragment of Venus at the aminoterminal or carboxyterminus. Combination of the split Venus-tagged TLRs and UNC93B1 was expressed in HEK 293T cells, and live cells were imaged by spinning disk confocal microscopy.

***Pseudomonas aeruginosa* Challenge and IL-12p40 Assay.** *P. aeruginosa* PAO1 and *fliC*-deficient ( $\Delta fliC$ ) strains were cultured in kanamycin-containing Luria broth. The cfu counts were calculated by counting colonies after overnight incubation of serially diluted bacteria culture on Luria broth/kanamycin agar plates and bacteria were heat-killed by incubation at 60  $^{\circ}$ C for 1 h. Splenic DCs were stimulated with *P. aeruginosa* (1,000 cfus per cell) in the presence of 10  $\mu$ g/mL Brefeldin A for 4 h, and IL-12p40 production was measured by intracellular cytokine staining by using anti-IL-12p40 antibody (clone C15.6; BioLegend).

4. Lee Y, et al. (2013) Intestinal Lin- c-Kit+ NKp46- CD4- population strongly produces IL-22 upon IL-1 $\beta$  stimulation. *J Immunol* 190(10):5296–5305.
5. Akashi S, et al. (2003) Lipopolysaccharide interaction with cell surface Toll-like receptor 4-MD-2: higher affinity than that with MD-2 or CD14. *J Exp Med* 198(7):1035–1042.
6. Choi SY, et al. (2006) A common lipid links Mfn-mediated mitochondrial fusion and SNARE-regulated exocytosis. *Nat Cell Biol* 8(11):1255–1262.











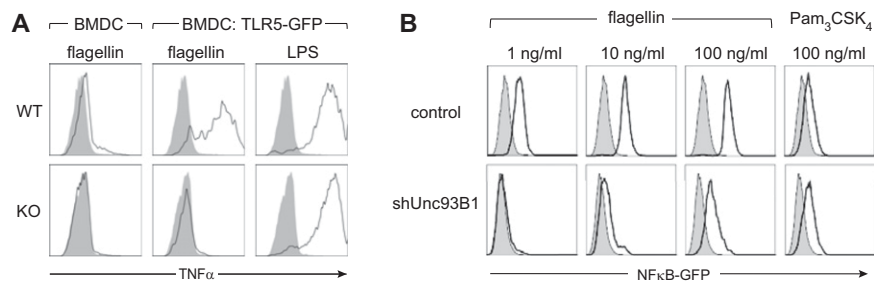

**Fig. 56.** UNC93B1 is required for TLR5-mediated signaling. (A) BMDCs from WT or UNC93B1-deficient mice were retrovirally transduced with TLR5-GFP (BMDC: TLR5-GFP) or not (BMDC). Cells were stimulated with flagellin (50 ng/mL) or LPS (100 ng/mL) in the presence of 10  $\mu$ g/mL Brefeldin A for 6 h, and intracellular TNF- $\alpha$  was measured by flow cytometry (open histograms). Shaded histograms represent the levels of TNF- $\alpha$  in unstimulated cells. Data shown are representative of three independent experiments. (B) NF- $\kappa$ B-GFP reporter gene was stably introduced into Ba/F3:TLR5-flag cells and the cells were further transduced with a control or *Unc93B1* shRNA-encoding vector. After stimulation with flagellin (1, 10, 100 ng/mL) or Pam<sub>3</sub>CSK<sub>4</sub> (100 ng/mL) for 24 h, induction of GFP expression was analyzed by flow cytometry. Shaded and open histograms show the GFP expression levels before and after stimulation, respectively. Data shown are representative of three independent experiments.

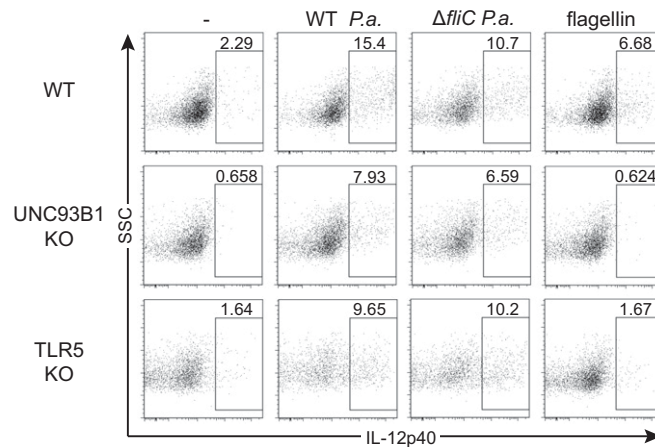

**Fig. 57.** Production of IL-12p40 in response to *P. aeruginosa* flagellin is dependent on UNC93B1. Splenic DCs enriched from WT, UNC93B1-deficient or TLR5-deficient mice were stimulated with heat-killed *P. aeruginosa* (WT and  $\Delta$ *fliC*) or purified flagellin for 4 h, and the levels of IL-12p40 in splenic DCs (MHC class II<sup>+</sup> CD11b<sup>high</sup>CD11c<sup>high</sup>) were measured by intracellular staining.
